# Supplementary material for: ATM gene mutations in sporadic breast cancer patients from Brazil
Source: PubMed Central journal article supplement (PMC4298590; doi:10.1186/s40064-015-0787-z), 2015-01-15

**Summary of the ATM variants observed by exome sequencing analysis in Tumor and Normal tissue of one breast cancer patient (M294)**

| Position<br>Exon/Intron | Nucleotide<br>Change | Residue  | N. altered reads/total N.<br>of reads |         | Genomic<br>Coordinate |
|-------------------------|----------------------|----------|---------------------------------------|---------|-----------------------|
|                         |                      |          | 294N                                  | 294T    |                       |
| Intron 7-8              | delT                 |          | 21/98                                 | 14/92   | 108114662             |
| Intron 8-9              | delT                 |          | 13/15                                 | 21/21   | 108115361             |
| Intron 13-14            | G>A                  |          | 26/54                                 | 19/32   | 108123290             |
| 16                      | TAC>TAT              | p.Y731Y  | 60/104                                | 61/116  | 108127010             |
| 19                      | CCT>TCT              | p.P872S  | 16/38                                 | 25/39   | 108138045             |
| Intron 19-20            | delT                 |          | 11/23                                 | 12/30   | 108139043             |
| 20                      | CTA>CTG              | p.L895L  | 9/24                                  | 9/29    | 108139183             |
| Intron 22-23            | C>T                  |          | 81/154                                | 55/101  | 108143182             |
| Intron 25-26            | insA                 |          | 40/80                                 | 39/76   | 108151707             |
| intron 36-37            | T>C                  |          | 20/ 45                                | 37/ 53  | 108172225             |
| 42                      | AAT>AGT              | p.N1983S | 198/198                               | 125/125 | 108183167             |
| 43                      | GGA>AGA              | p.G2023R | 54/98                                 | 31/57   | 108186610             |
| Intron 43-44            | T>C                  |          | 37/89                                 | 20/ 46  | 108186653             |
| Intron 47-48            | G>T                  |          | 4/8                                   | 8/17    | 108192159             |
| Intron 48-49            | G>C                  |          | 4/ 8                                  | 8 /17   | 108196509             |
| Intron 55-56            | G>A                  |          | 69/69                                 | 51/51   | 108203769             |
| Intron 56-57            | INS T                |          | 47/106                                | 37/ 85  | 108204717             |
| Intron 59-60            | A>G                  |          | 13/21                                 | 8/ 18   | 108214176             |
| Intron 61-62            | T>C                  |          | 30/63                                 | 17/ 29  | 108218196             |
| Intron 62-63            | C>T                  |          | 42/79                                 | 38/ 61  | 108225483             |
| Intron 63-64            | A>G                  |          | 15/30                                 | 21/ 31  | 108225661             |

Chromosomal coordinates of the ATM variants observed by exome sequencing analysis of Tumor and Normal tissues from one breast cancer patient (M294). The results were analyzed using the Golden Helix GenomeBrowser ([www.goldenhelix.com/GenomeBrowse/](http://www.goldenhelix.com/GenomeBrowse/))

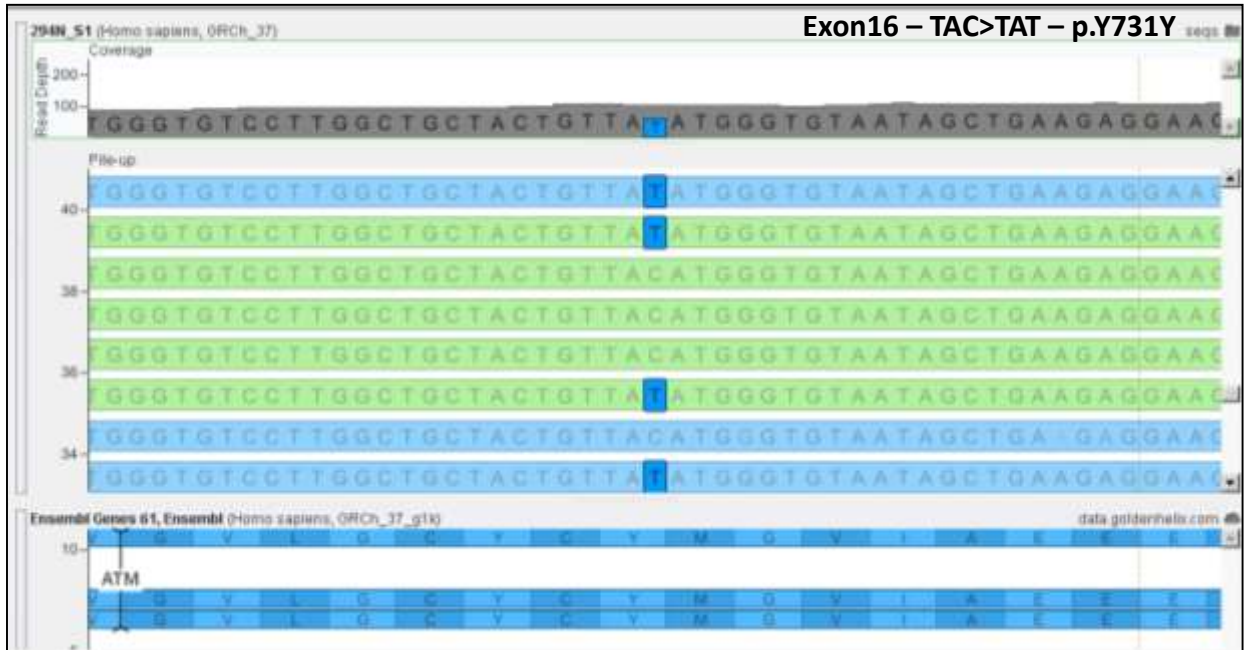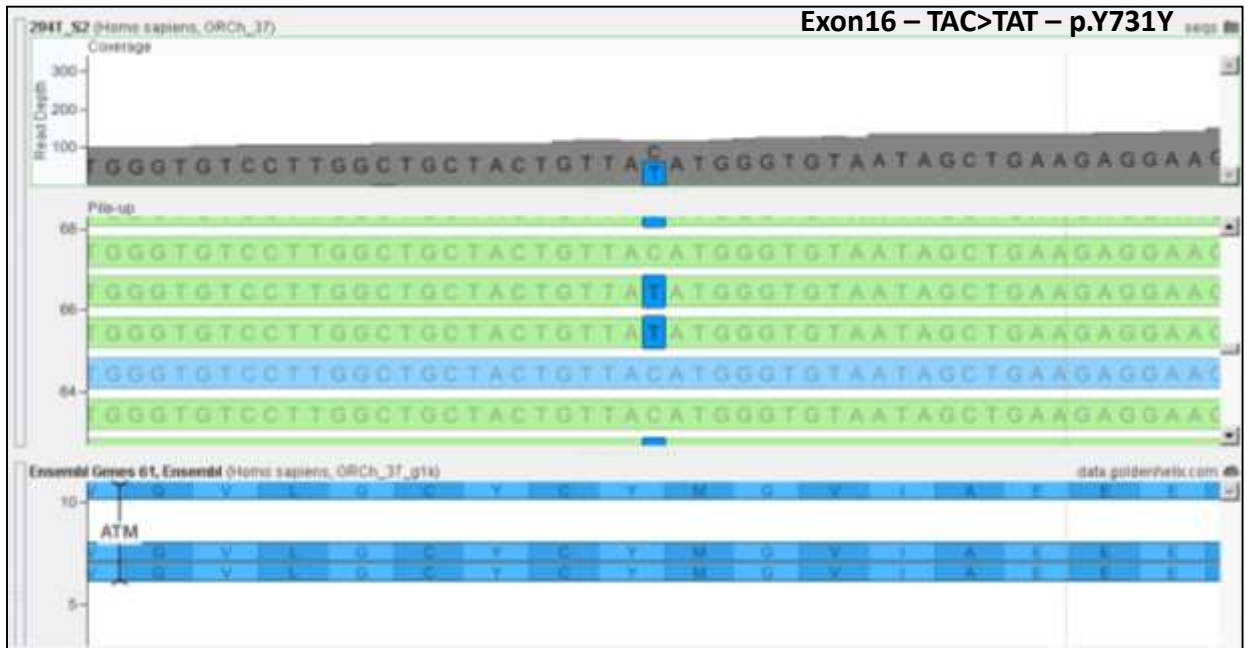

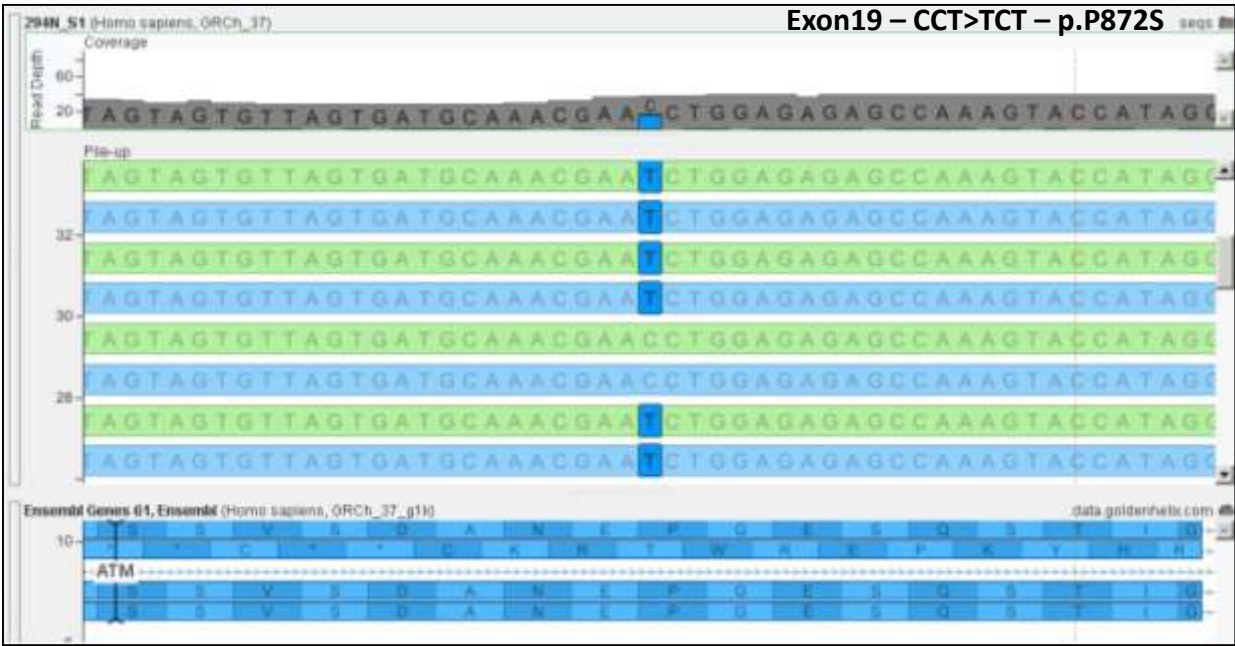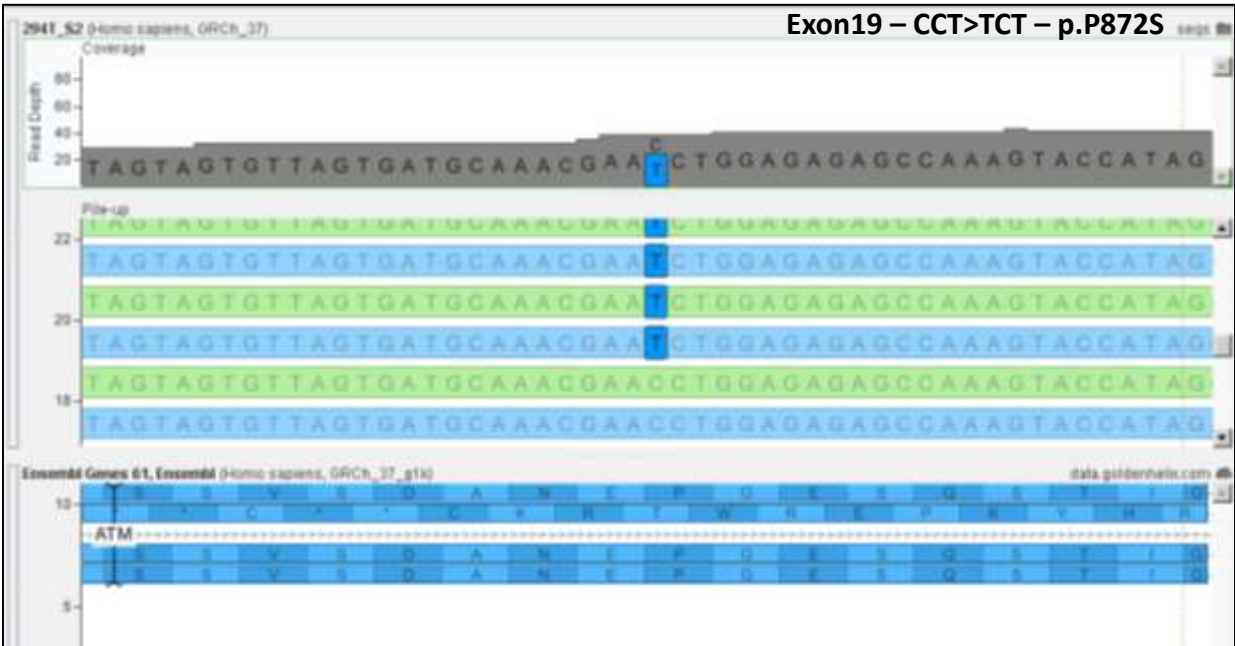

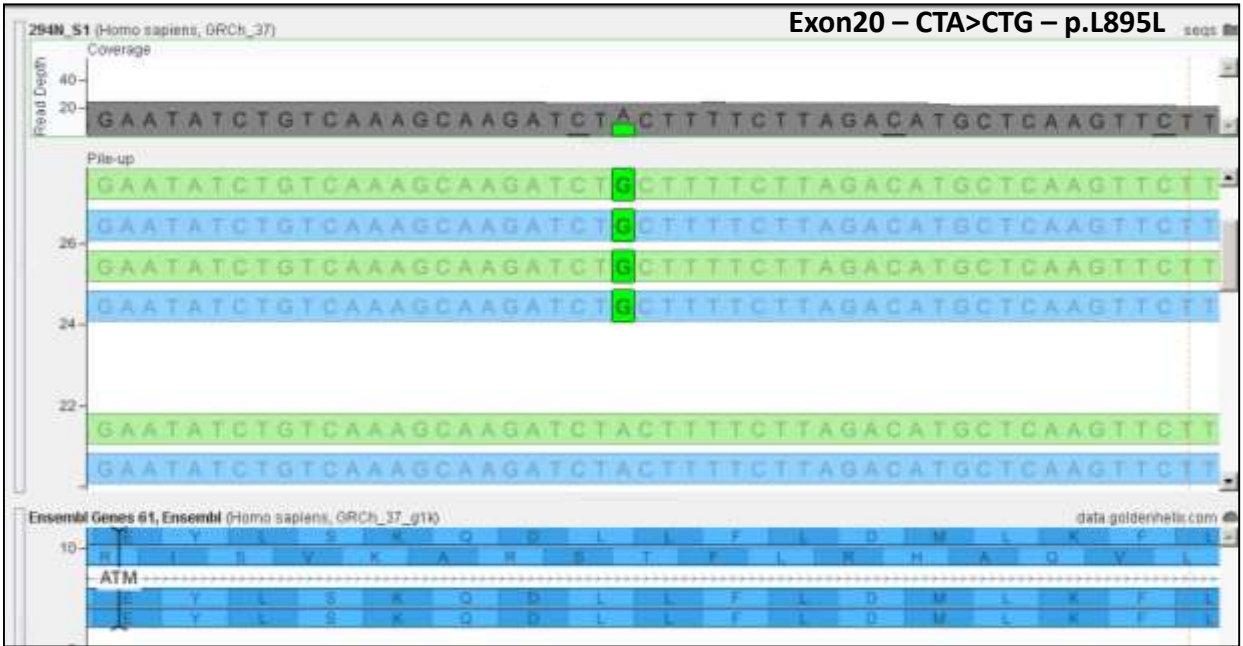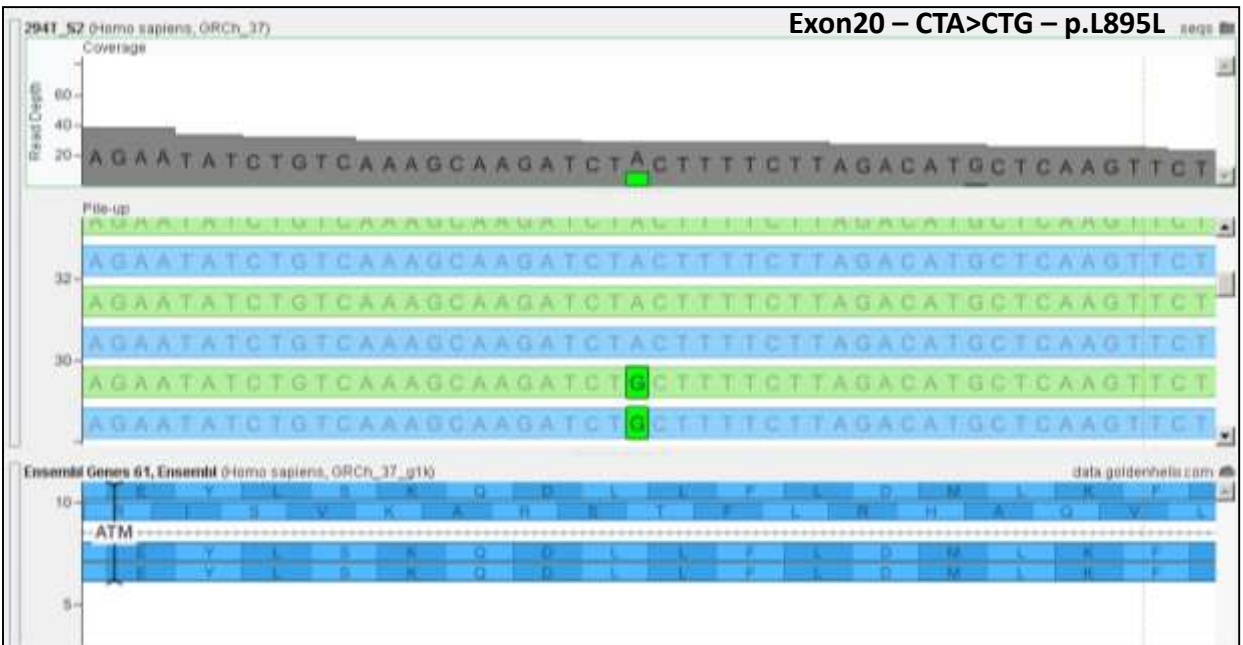

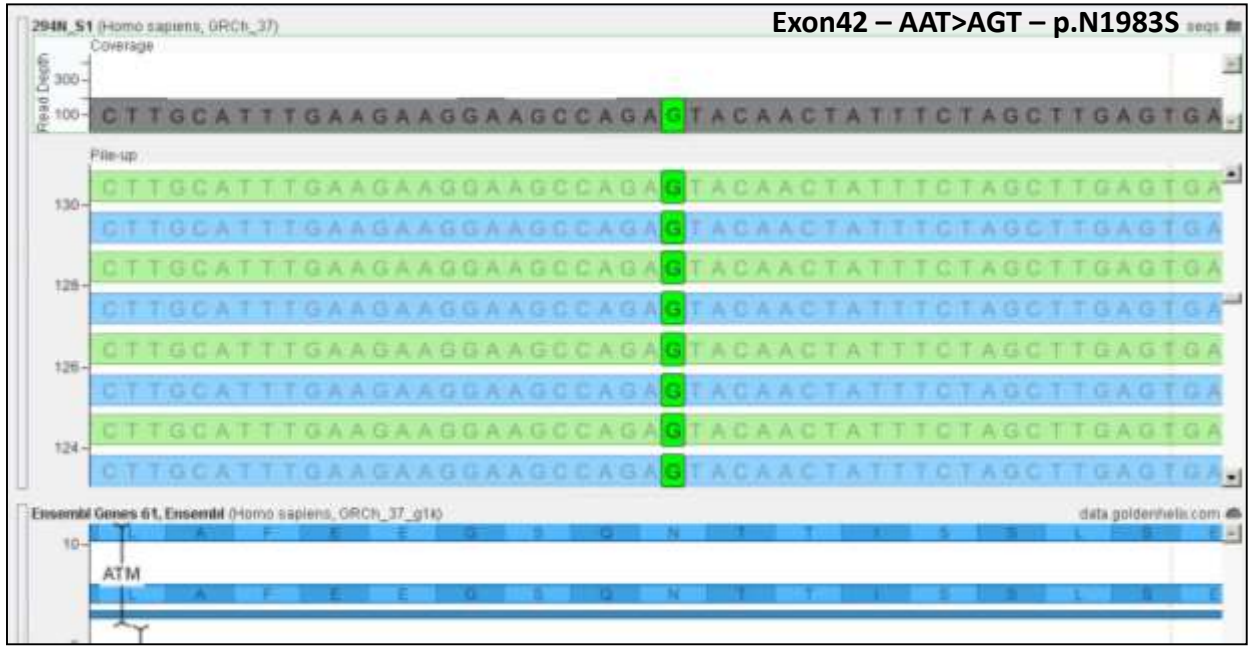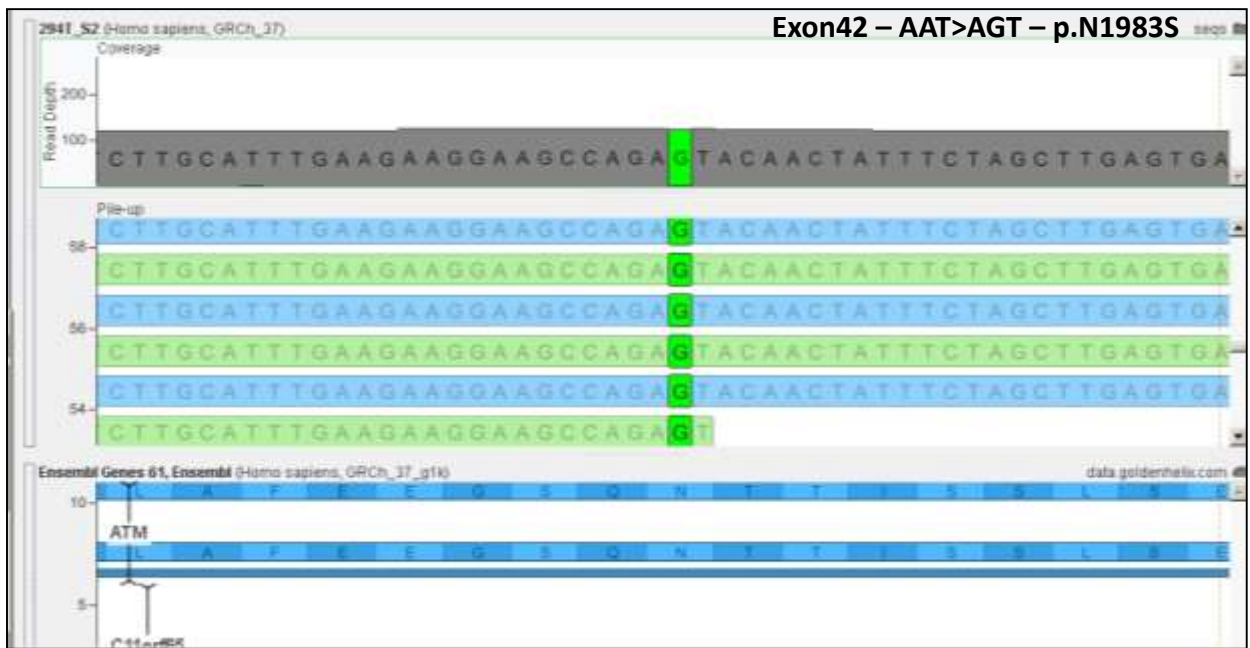

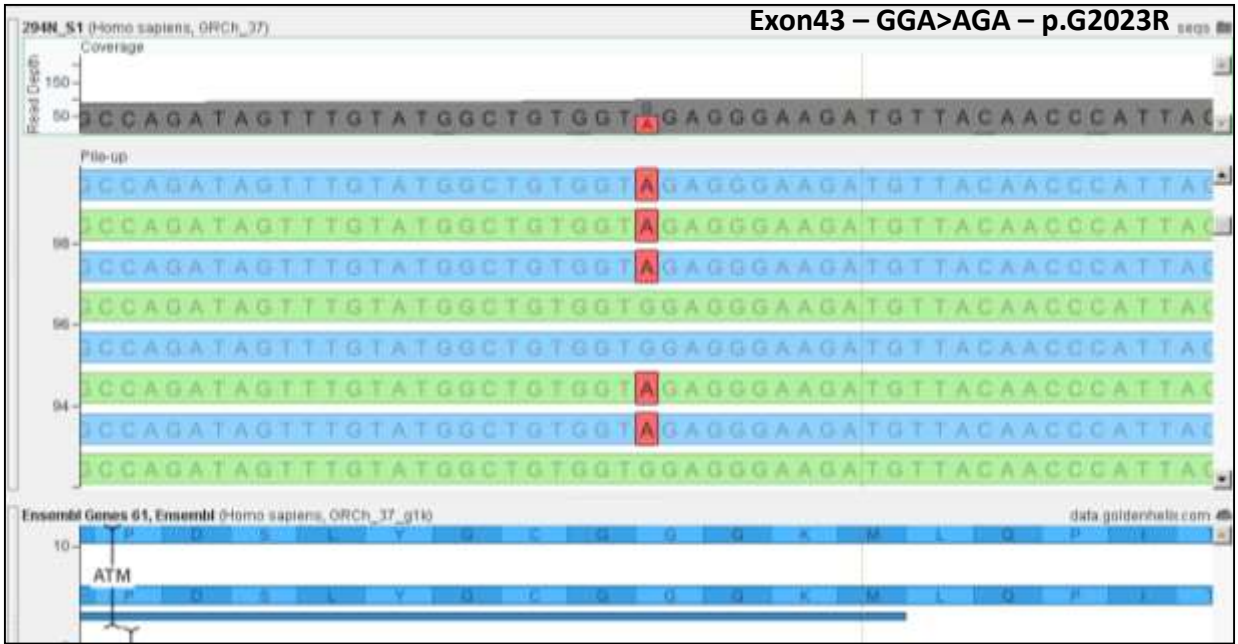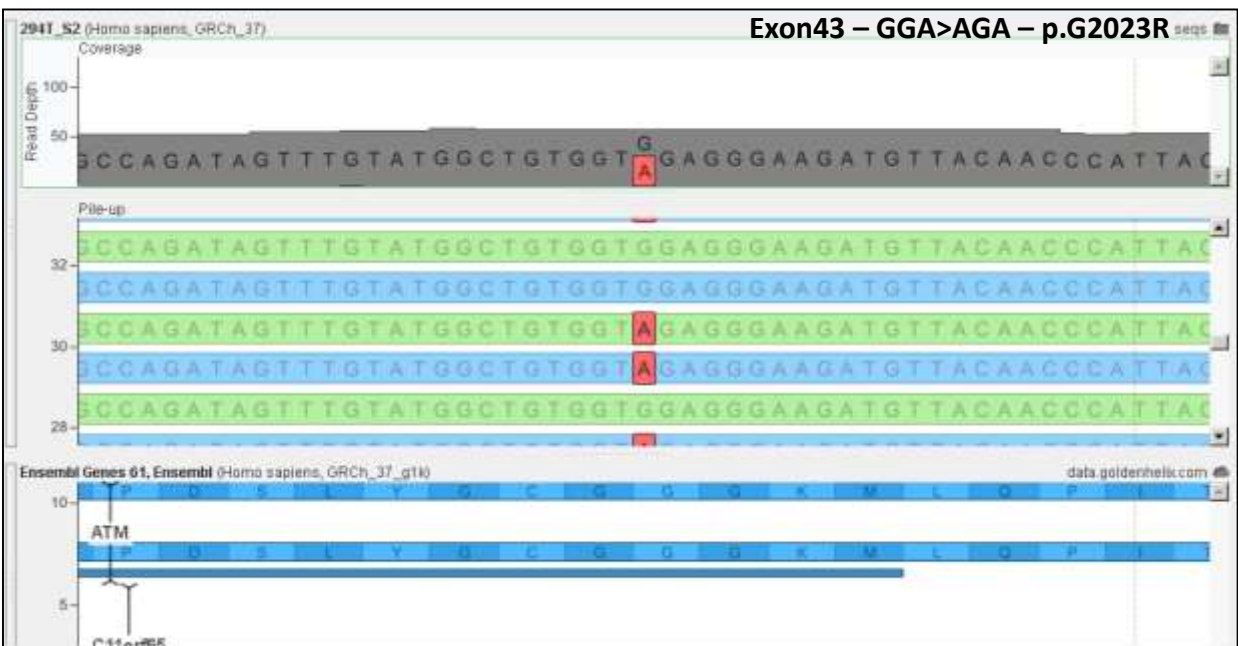

Supplement: 40064_2015_787_MOESM2_ESM.pdf [file 40064_2015_787_MOESM2_ESM.pdf]
