# Supplementary material for: ATM gene mutations in sporadic breast cancer patients from Brazil
Source: PubMed Central journal article supplement (PMC4298590; doi:10.1186/s40064-015-0787-z), 2015-01-15
Supplement: 40064_2015_787_MOESM1_ESM.pdf [file 40064_2015_787_MOESM1_ESM.pdf]

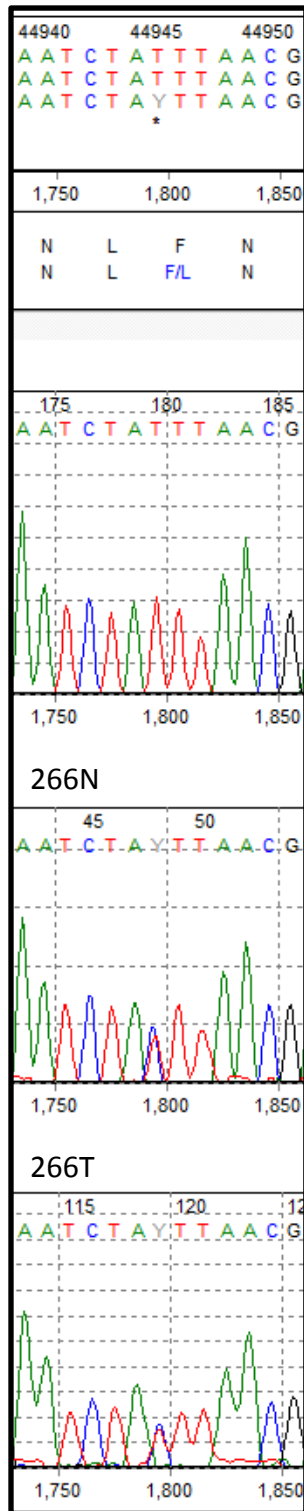

Exon 19  
 c.2572T>C  
 p.F858L

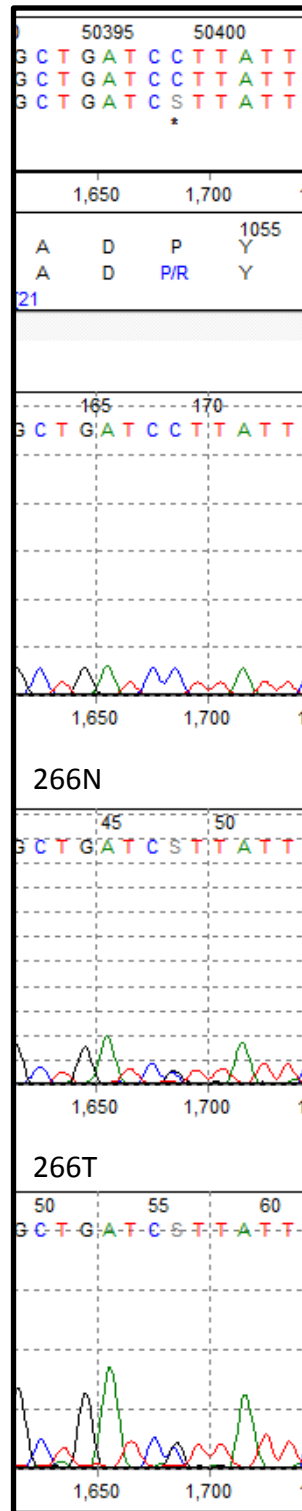

Exon 24  
 c.3161C>G  
 p.P1054R

Supplementary Material 1. Representative example of the sequencing analysis of a breast cancer patient harboring both variants p.F858L and p.P1054R.
